# Supplementary material
Source: publisher figshare collection journal article supplement (https://frontiersin.figshare.com/ndownloader/files/38758011)
Supplement: Supplementary file [file 38758011]

Supplementary information

Supplementary Figure

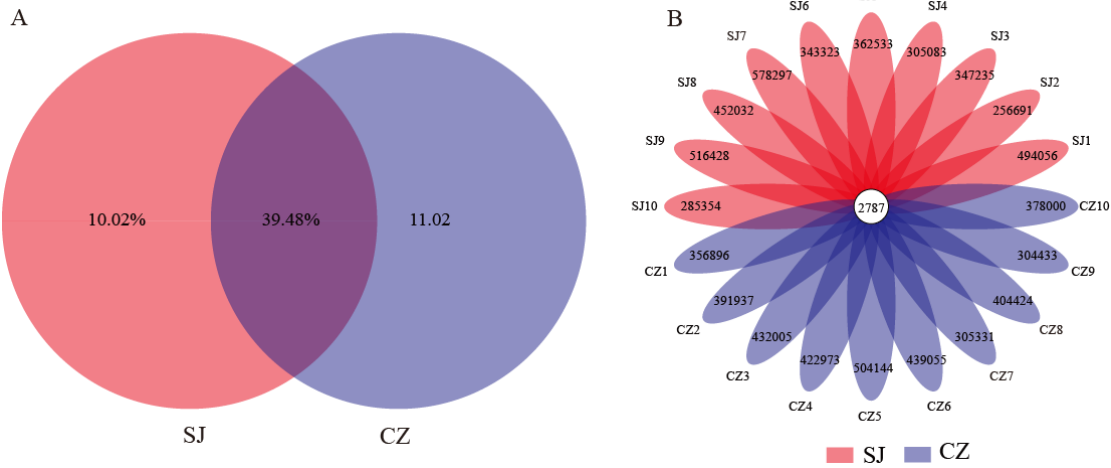

**Supplementary Figure 1** Venn analysis (A) unique core OTUs (B) of gut microbiome from *A. erythropus* wintering at Shengjin (SJ) and Caizi (CZ) Lakes.
